# Supplementary material for: A binder-free process for making all-plastic substrate flexible dye-sensitized solar cells having a gel electrolyte
Source: Royal Society of Chemistry journal article supplement (doi:10.1039/c2jm15360b), 2012-01-01
Supplement: c2jm15360b.pdf [file c2jm15360b.pdf]

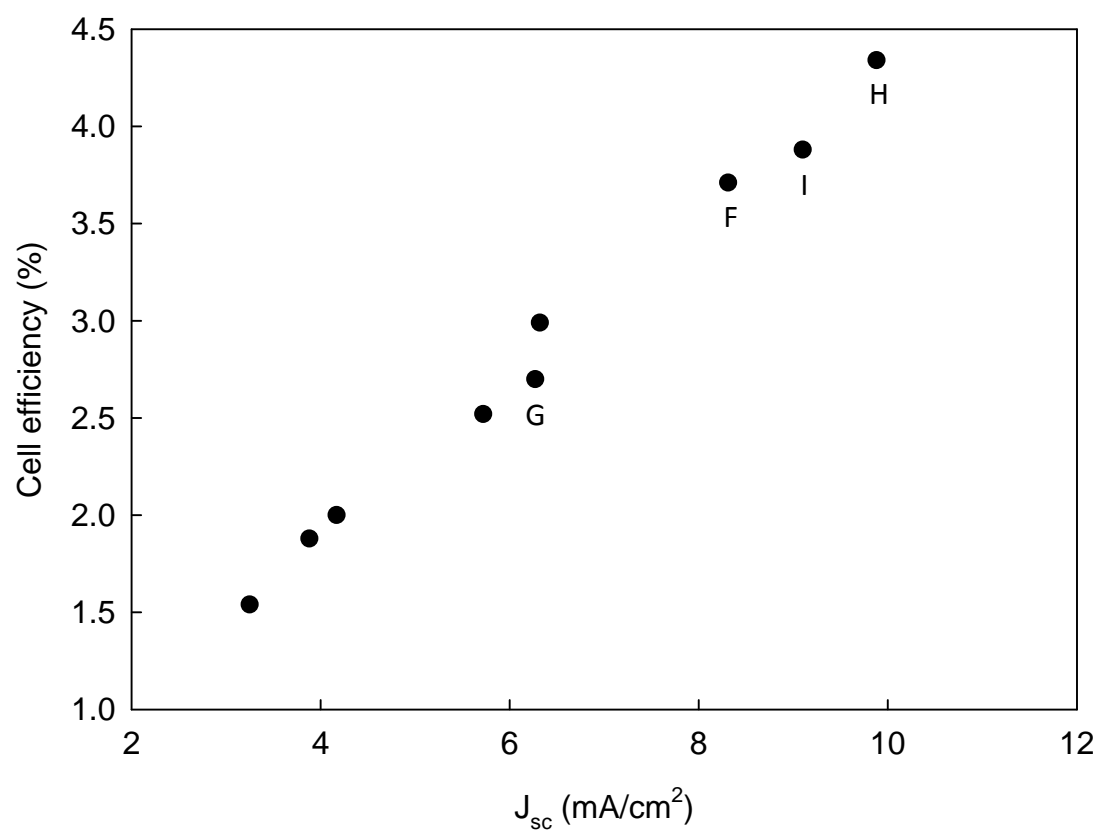

Fig. S1. In general, the cell efficiency increases with the short circuit current density.

Selected cell IDs are given.

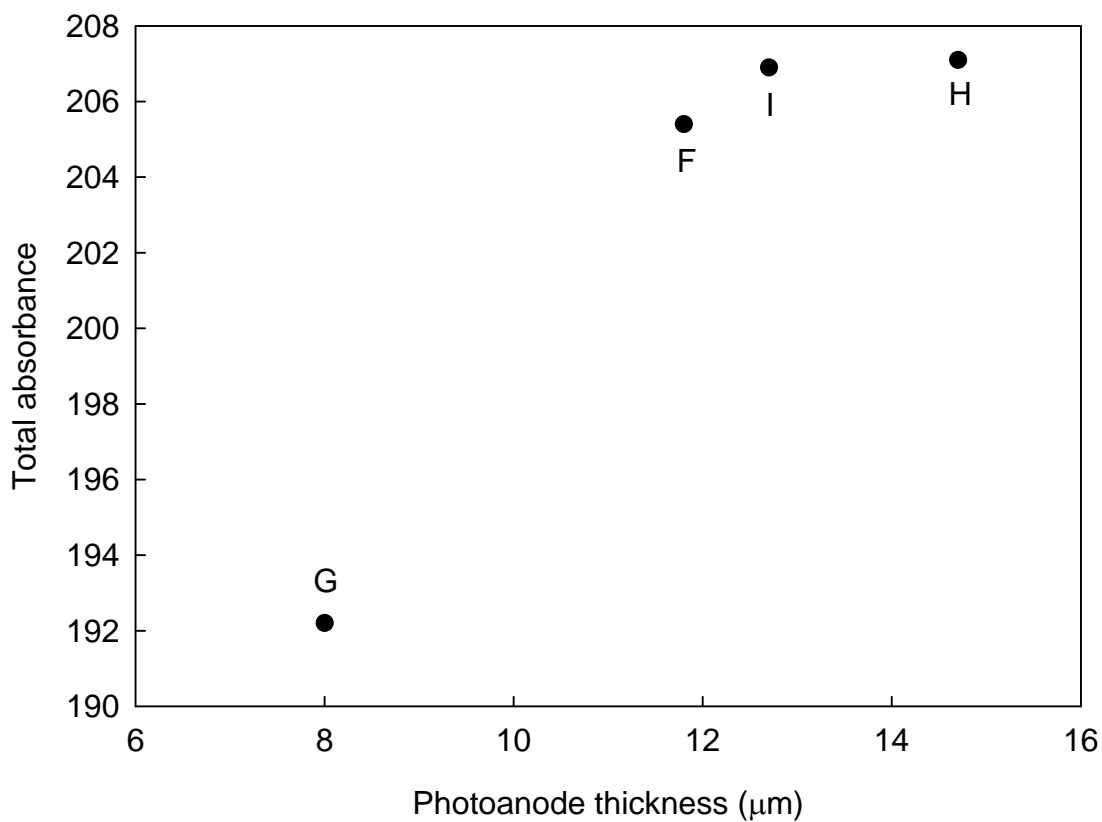

Fig. S2. The total absorbance increases with the photoanode thickness

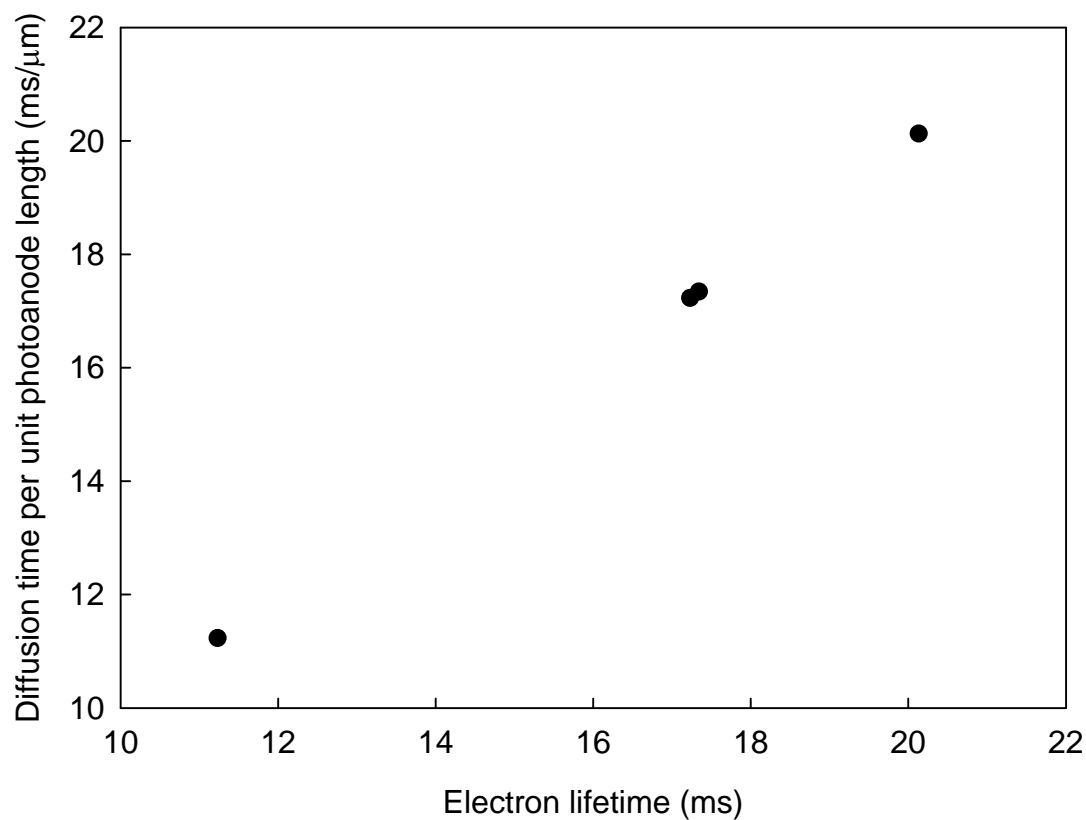

Fig. S3.  $\tau_n$  is inversely proportional to  $\tau_d/\mu m$  in a linear fashion.

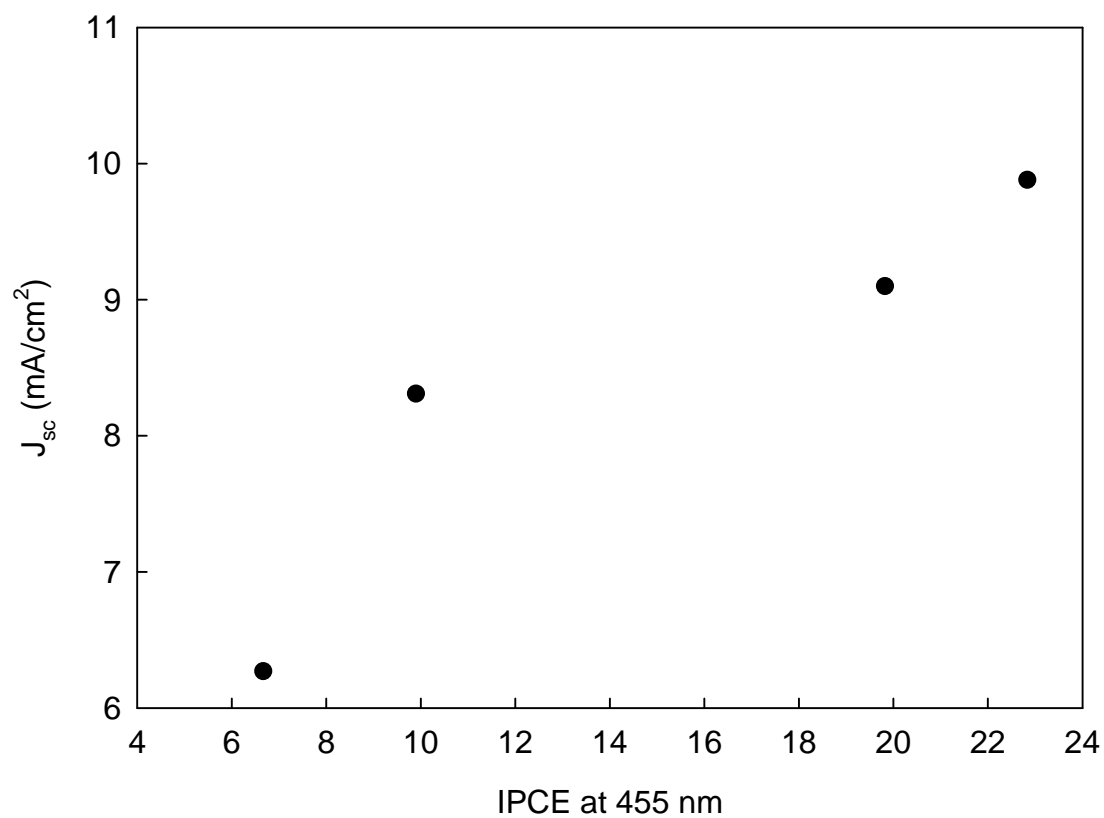

Fig. S4.  $J_{sc}$  is proportional to IPCE. This figure takes the IPCE at 455 nm as an example.
